# Supplementary material for: Combination of AID2 and BromoTag expands the utility of degron-based protein knockdowns
Source: PubMed Central journal article supplement (PMC11387839; doi:10.1038/s44319-024-00224-4), 2024-08-23
Supplement: 44319_2024_224_MOESM1_ESM.pdf [file 44319_2024_224_MOESM1_ESM.pdf]

1  
2  
3  
4  
5  
6  
7  
8  
9  
10  
11  
12  
13  
14  
15  
16  
17  
18  
19  
20  
21  
22  
23  
24  
25

# Appendix

## Table of content

**Appendix Figure S1.** Schematic illustration showing the AID2, dTAG and BromoTag systems. (page 2)

**Appendix Figure S2.** Comparison of the AID2, dTAG and BromoTag systems using a GFP reporter. (page 3–4)

**Appendix Figure S3.** Re-expression of the reporter after depletion by the AID2, dTAG or BromoTag system. (page 5)

**Appendix Figure S4.** Related to Fig. 4. (page 6)

**Appendix Figure S5.** DNA damage foci formation in mAB-ORC1 and mAB-CDC6 cells. (page 7)

**Appendix Figure S6.** Double-degron with mAID and BromoTag enhances CDC6 depletion and confers profound defects in DNA replication. (pages 8–9)

**Appendix Figure S7.** The 2mAID tag confers lower the expression level of ORC1 and CDC6. (page 10)

**Appendix Figure S8.** Combinational depletion of ORC1 or CDC6 by siRNA and AID2-BromoTag enhances defects in S phase progression. (page 11)

**Appendix Figure S9.** The mAB-ORC1 mAB-CDC6 cells enter mitosis without DNA replication after ORC1 and CDC6 co-depletion. (page 12)

**Appendix Reference** (page 13)

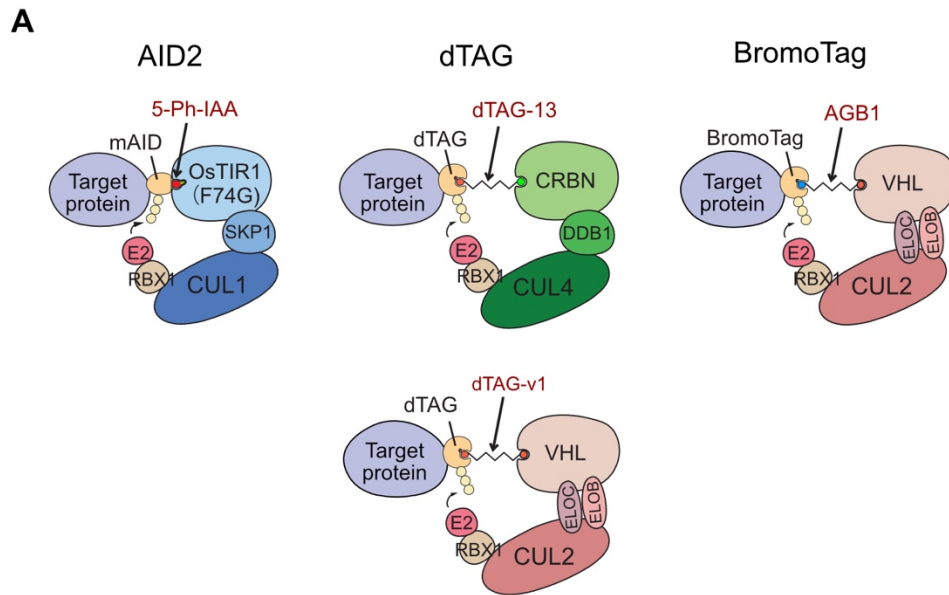

| Degron      | mini-AID (mAID)<br>= IAA17(65–132aa) | dTAG<br>= FKBP12(F36V) | BromoTag<br>= BRD4-BD2(L387A) |
|-------------|--------------------------------------|------------------------|-------------------------------|
| Degron size | 7.5 kDa                              | 11.7 kDa               | 14.8 kDa                      |
| Ligand      | 5-Ph-IAA                             | dTAG-13, dTAG-v1       | AGB1                          |
| E3 ligase   | CRL1–OsTIR1(F74G)                    | CRL4–CRBN, CRL2–VHL    | CRL2–VHL                      |

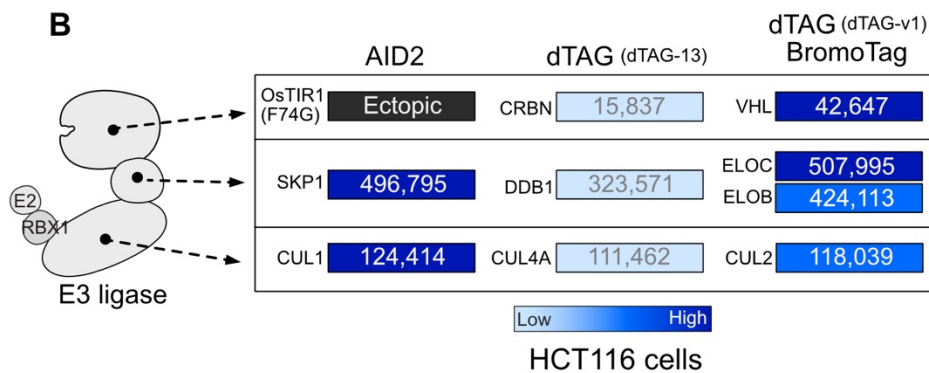

26

27 **Appendix Figure S1**

28 (A) Schematic illustration showing the AID2, dTAG and BromoTag systems. The  
 29 table shows degron size, inducing ligand and the E3 ligase involved in target  
 30 degradation. (B) The expression level of each E3 ligase component in HCT116 cells,  
 31 originated from the paper by Bekker-Jensen et al (Bekker-Jensen *et al*, 2017).

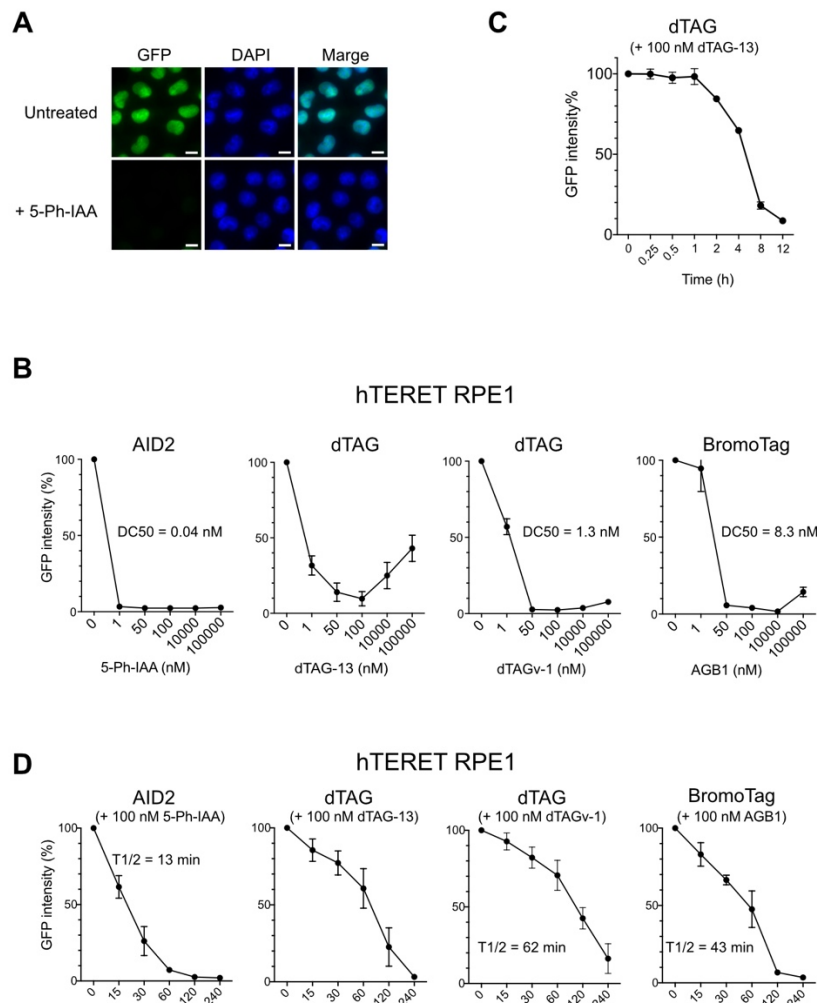

32

33 **Appendix Figure S2**

34 Comparison of the AID2, dTAG and BromoTag systems using a GFP reporter. (A)

35 Representative fluorescent microscopic images of the HCT116 dTAG-BromoTag-

36 mAID-EGFP-NLS reporter cells. The cells were treated with or without 1  $\mu$ M 5-Ph-

37 IAA for 2 h before fixation. The nuclei were stained with DAPI. Scale bars: 10  $\mu$ m. (B)

38 Dose-response of reporter depletion. The hTERT-RPE1 reporter cells were treated

39 with the indicated concentrations of each ligand for 4 h. GFP intensity was analyzed

40 taking the mock-treated cells as 100%. Data were presented as mean  $\pm$  SD of three

41 technical replicates (n=3). The DC50 values were calculated with the non-linear

42 regression model on Graphpad Prism 8. (C) Time-course depletion of the reporter.

43 The HCT116 GFP reporter cells were treated with 100 nM dTAG-13 as in Fig. 2C.

44 Time-course samples were taken up to 12 h. (D) Time-course depletion of the

45 reporter in hTERT-RPE1 cells. Cells were treated with 100 nM of the indicated

46 ligand. Samples were taken at the indicated time point. GFP intensity was analyzed

47 taking the mock-treated cells as 100%. Data were presented as mean  $\pm$  SD of three

48 technical replicates (n=3). The T1/2 was calculated with the non-linear regression  
49 model on Graphpad Prism 8.

**A**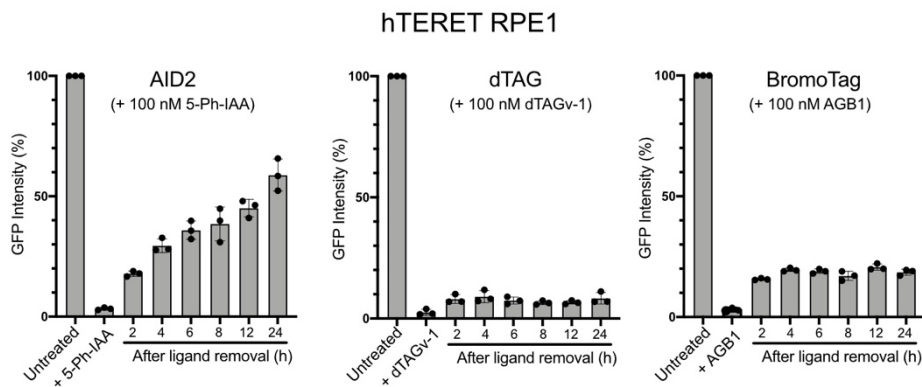**B**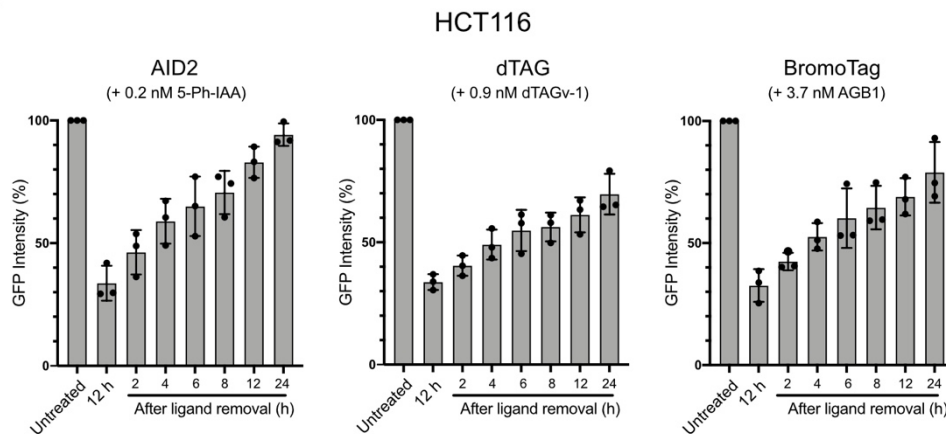

50

**Appendix Figure S3**

51 **(A)** Re-expression of the reporter after depletion by the AID2, dTAG or BromoTag  
 52 system in hTERT REP1 cells. The reporter cells were treated with 1nM 5-Ph-IAA,  
 53 100 nM dTAGv-1 or 100 nM AGB1 for 4 h before medium change. Samples were  
 54 taken at the indicated time points, and the GFP intensity was analyzed by taking the  
 55 mock-treated cells as 100%. Data were presented as mean  $\pm$  SD. Each dot  
 56 represents a technical replicate (n=3). **(B)** The HCT116 GFP reporter cells were  
 57 treated with 0.5 nM 5-Ph-IAA, 0.9 nM dTAGv-1 or 3.7 nM AGB1 for 12 h to lower the  
 58 reporter level down to approximately 30%. Subsequently, the cells were washed, and  
 59 re-expression of the reporter was monitored up to 24 h. Data were presented as  
 60 mean  $\pm$  SD. Each dot represents a technical replicate (n=3).  
 61

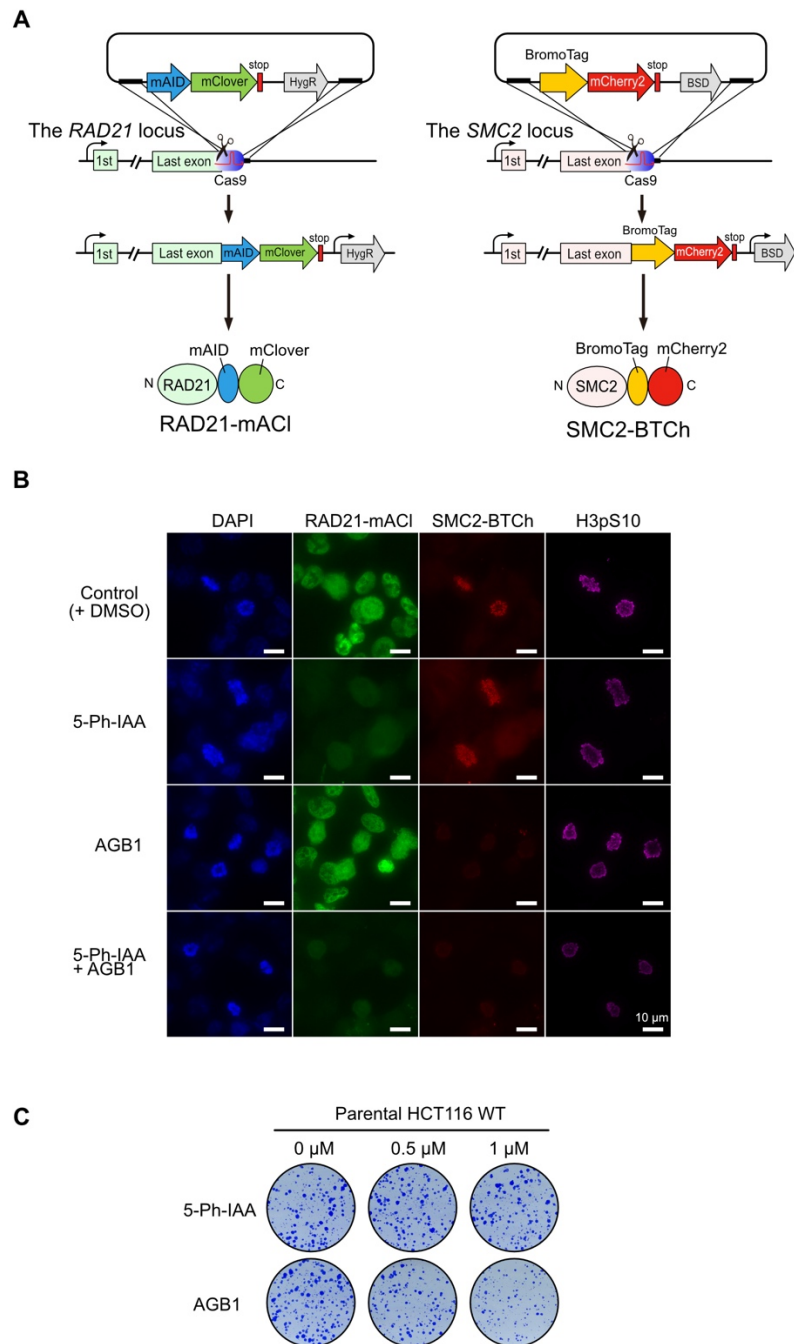

62

63 **Appendix Figure S4**

64 Related to Fig. 4. (A) Illustration showing the construction cells expressing RAD21-  
 65 mAID-mClover (RAD21-mAC) and SMC2-BromoTag-mCherry2 (SMC2-BCh). (B)  
 66 Fluorescent microscopic images of the RAD21-mAC/SMC2-BTCh cell line in the  
 67 presence and absence of 1  $\mu$ M 5-Ph-IAA and/or 0.5  $\mu$ M AGB1 for 4 h. Mitotic cells  
 68 were stained with anti p-Histone H3 (Ser10) antibody. Ten slices taken every 0.5  $\mu$ m  
 69 were stacked. Scale bar: 10  $\mu$ m. (C) Testing side effects of 5-Ph-IAA and AGB1 by  
 70 colony formation. The parental HCT116 WT cells were cultured with the indicated  
 71 dose of 5-Ph-IAA or AGB1 for 7 days. Colonies were stained with crystal violet.

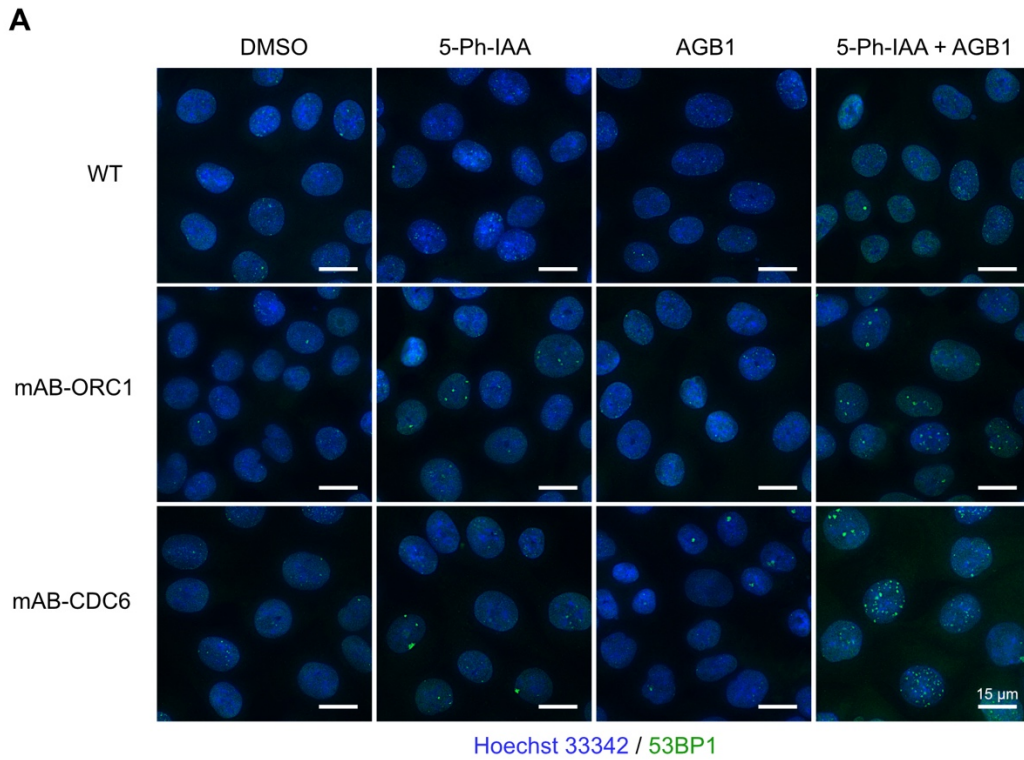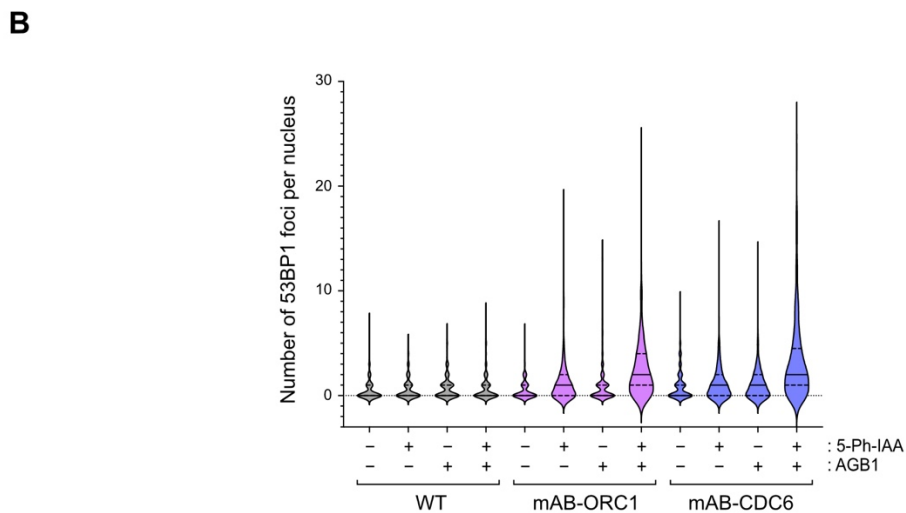

72

73 **Appendix Figure S5**

74 DNA damage foci formation in mAB-ORC1 and mAB-CDC6 cells. **(A)**

75 Representative 53BP1 immunofluorescence images after treating the indicated cells

76 with 1  $\mu$ M 5-Ph-IAA, 0.5  $\mu$ M AGB1 or both for 43 h. 53BP1 and DNA are shown in

77 green and blue, respectively. **(B)** The number of 53BP1 foci per nucleus was

78 quantified and presented in the violin plot. The solid lines show the median and

79 dashed lines show the quartiles. More than 250 nuclei were quantified in each

80 condition.



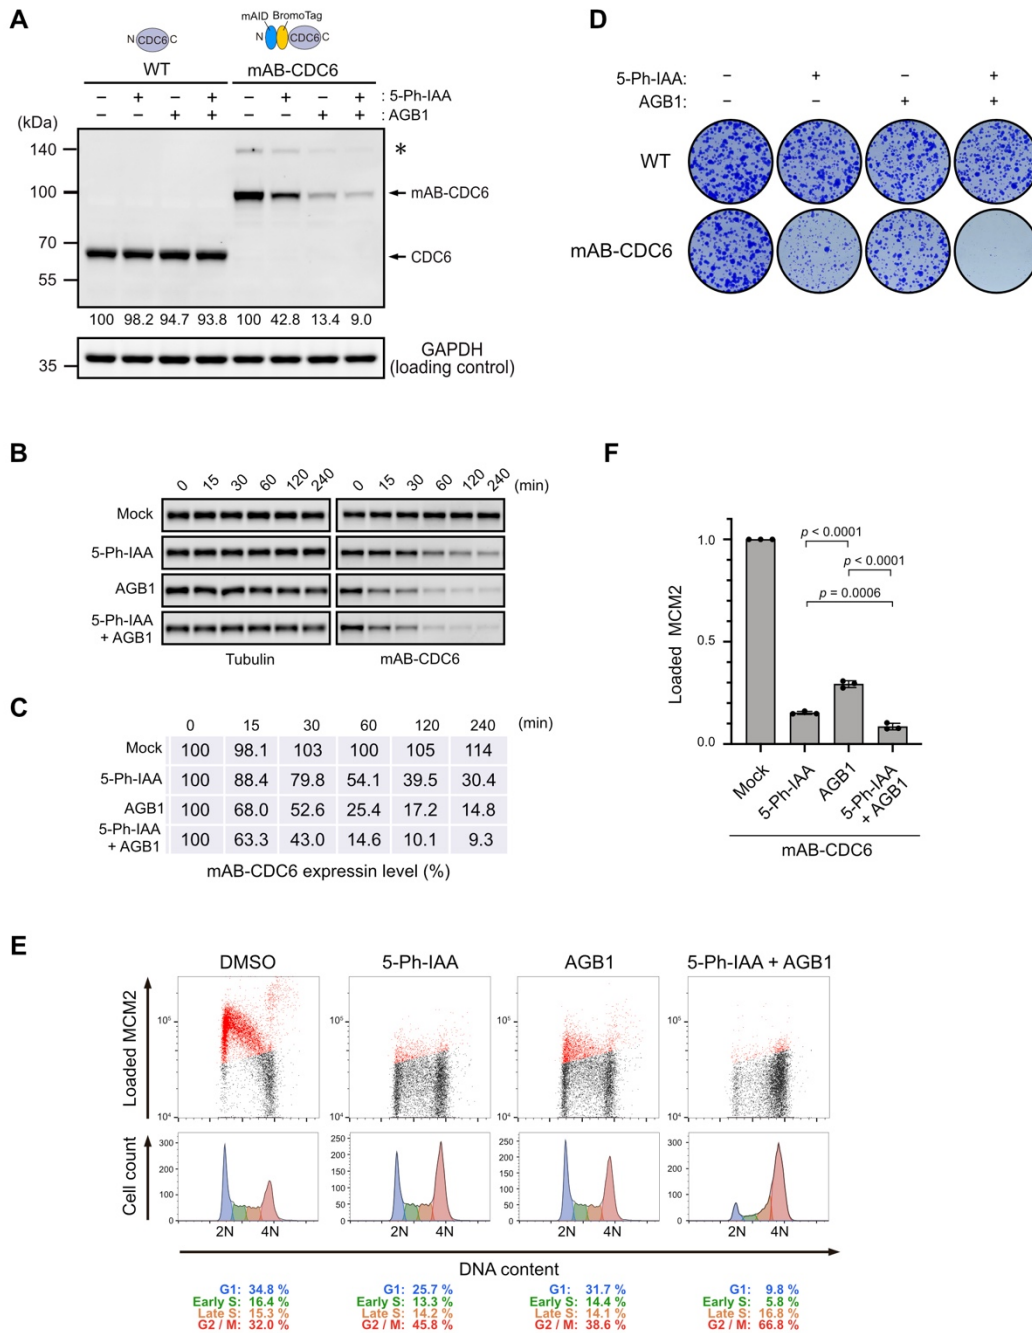

81

## 82 Appendix Figure S6

83 Double-degron with mAID and BromoTag enhances CDC6 depletion and confers  
 84 profound defects in DNA replication. **(A)** The parental HCT116 wild-type (WT) and  
 85 mAID-BromoTag-CDC6 (mAB-CDC6) cells were treated with 1  $\mu$ M 5-Ph-IAA, 0.5  $\mu$ M  
 86 AGB1 or both for 2 h. Proteins were detected by anti-CDC6 and -GAPDH antibodies.  
 87 Relative CDC6 levels taking the DMSO-treated control as 100% were shown under  
 88 each blot. Each data was normalized with the corresponding tubulin loading control.  
 89 The asterisk indicates the HygR-P2A-mAID-BromoTag-CDC6 protein before self-  
 90 cleavage at the P2A site. **(B)** Depletion kinetics of mAB-CDC6 in cells treated with 1



91  $\mu\text{M}$  5-Ph-IAA and/or  $0.5 \mu\text{M}$  AGB1. Samples were taken at the indicated time points.  
92 **(C)** The blot data in panel B were quantified taking the 0 min sample as 100%. Each  
93 data was normalized with the corresponding tubulin loading control. **(D)** Colony  
94 formation of the parental HCT116 WT and mAB-CDC6 cells. Cells were cultured in  
95 the presence or absence of  $1 \mu\text{M}$  5-Ph-IAA and/or  $0.5 \mu\text{M}$  AGB1 for 7 days. Colonies  
96 were stained with crystal violet. **(E)** (Upper panels) Levels of chromatin-loaded  
97 MCM2 and DNA in mAB-CDC6 treated with  $1 \mu\text{M}$  5-Ph-IAA and/or  $0.5 \mu\text{M}$  AGB1 for  
98 24 h. The MCM2-positive cells are shown in red. (Lower panels) Cell count  
99 histogram to the same samples. The percentages of each cell cycle are shown  
100 below. **(F)** Levels of chromatin-loaded MCM2 in mAB-CDC6 cells treated with the  
101 indicated ligand. Data were presented as mean  $\pm$  SD. Each dot represents a  
102 technical replicate ( $n=3$ ). Cells were synchronized in M phase with  $50 \text{ ng/mL}$   
103 nocodazole for 14 h and released into a fresh media containing ligand. Cells were  
104 treated with  $1 \mu\text{M}$  5-Ph-IAA and/or  $0.5 \mu\text{M}$  AGB1 2 h prior to nocodazole release.  
105 Samples were taken at 4 h after release when cells were in G1. Statistical analysis  
106 was performed with Tukey's multiple comparison test.





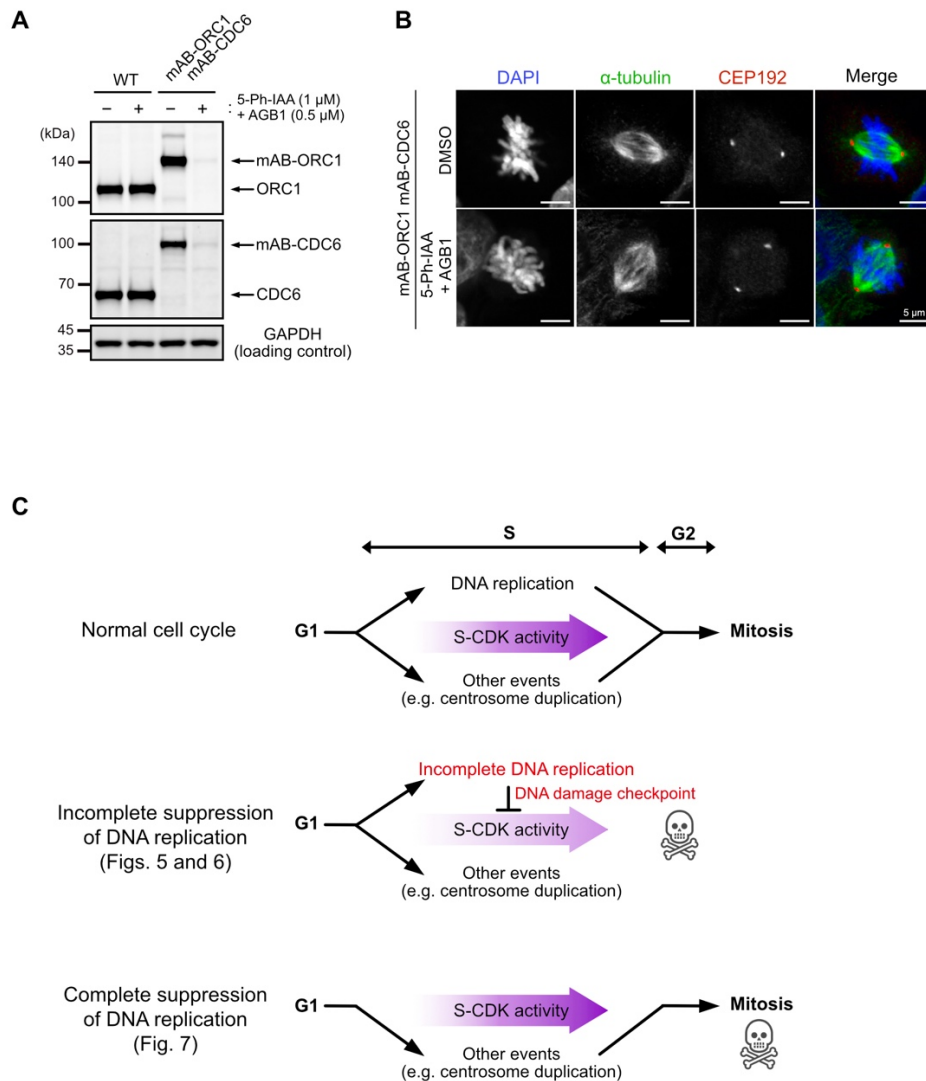

132

133 **Appendix Figure S9**

134 The mAB-ORC1 mAB-CDC6 cells enter mitosis without DNA replication after ORC1  
 135 and CDC6 co-depletion. (A) mAID-BromoTag was fused to the N-terminus of ORC1  
 136 and CDC6. The cells were treated with or without 1  $\mu$ M 5-Ph-IAA and 0.5  $\mu$ M AGB1  
 137 for 2 h before harvesting. Proteins were detected with anti-ORC1, -CDC6 and -  
 138 GAPDH antibodies. (B) Confocal microscopic images of metaphase cells. DNA,  
 139 mitotic spindle and centrosomes were stained by DAPI, anti- $\alpha$ -tubulin antibody and  
 140 anti-CEP192 antibody, respectively. mAB-ORC1 mAB-CDC6 cells were cultured with  
 141 or without 1  $\mu$ M 5-Ph-IAA and 0.5  $\mu$ M AGB1 for 24 h before fixation. (C) Illustration  
 142 showing the relationship between DNA replication and the cell cycle control.  
 143 Complete DNA suppression bypasses DNA replication resulting premature mitosis.  
 144 Note that both incomplete and complete suppression of DNA replication leads to cell  
 145 death. However, they were arrested at different cell cycle phases (late S/G2 and M,  
 146 respectively).

147 **Appendix Reference**

148 Bekker-Jensen DB, Kelstrup CD, Batth TS, Larsen SC, Haldrup C, Bramsen JB,  
149 Sorensen KD, Hoyer S, Orntoft TF, Andersen CL *et al* (2017) An Optimized Shotgun  
150 Strategy for the Rapid Generation of Comprehensive Human Proteomes. *Cell Syst* 4:  
151 587-599 e584  
152
